# Supplementary material for: Simultaneous Modification of Properties Relevant to the Processing and Application of Virgin and Post-Consumer Polypropylene
Source: MDPI journal article supplement (doi:10.3390/polym15071717), 2023-03-30
Supplement: s1 [file s1]

Supplementary Material

# Simultaneous Modification of Properties Relevant to the Processing and Application of Virgin and Post-Consumer Polypropylene

Ines Traxler <sup>1,\*</sup>, Hannes Kaineder <sup>2</sup> and Joerg Fischer <sup>2</sup>

<sup>1</sup> Competence Center CHASE GmbH, Altenberger Strasse 69, 4040 Linz, Austria

<sup>2</sup> Institute of Polymeric Materials and Testing, Johannes Kepler University, Altenberger Strasse 69, 4040 Linz, Austria

\* Correspondence: ines.traxler@chasecenter.at; Tel.: +43-664-8568524

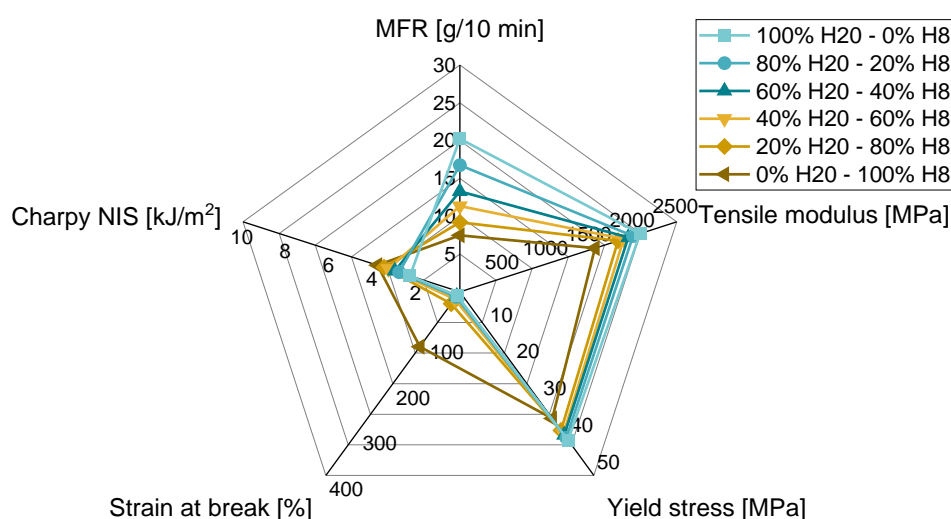

Figure S1. Property profiles of all blends of H20-H8.

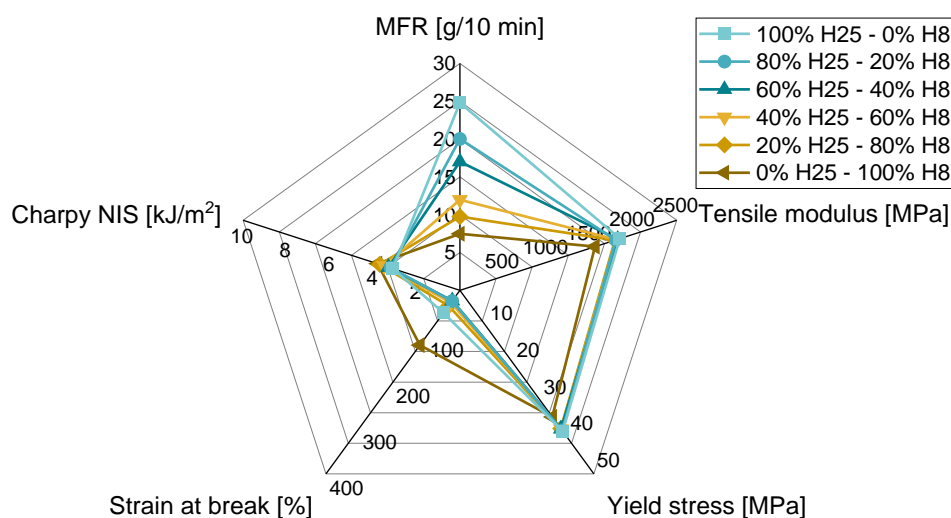

Figure S2. Property profiles of all blends of H25-H8.

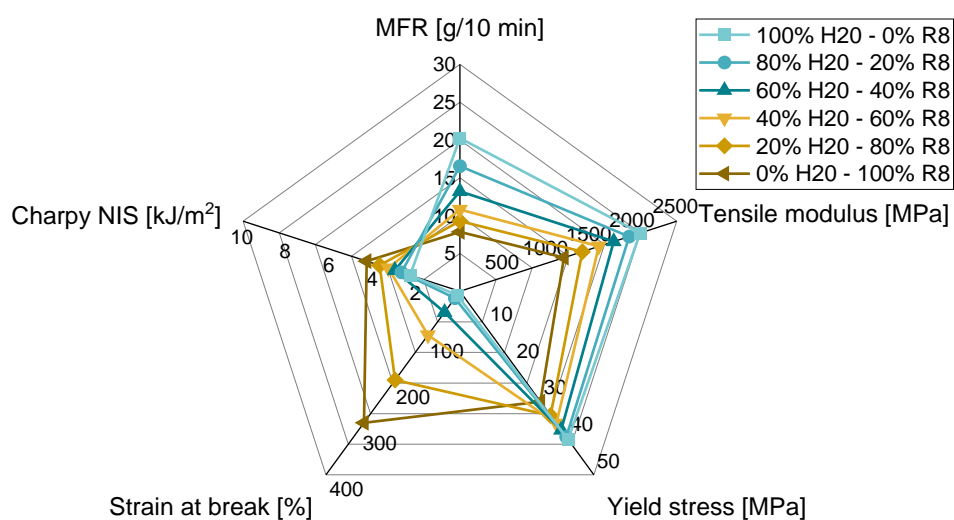

Figure S3. Property profiles of all blends of H20-R8.

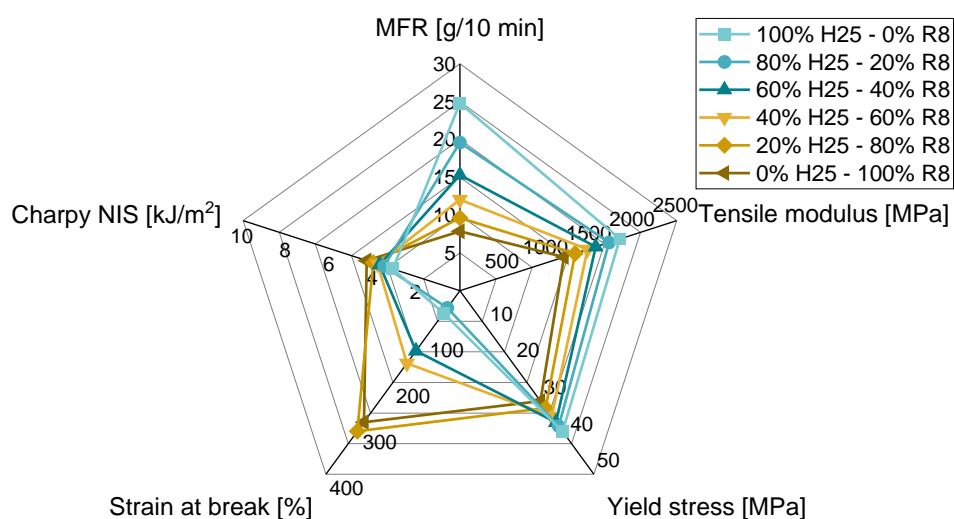

Figure S4. Property profiles of all blends of H25-R8.

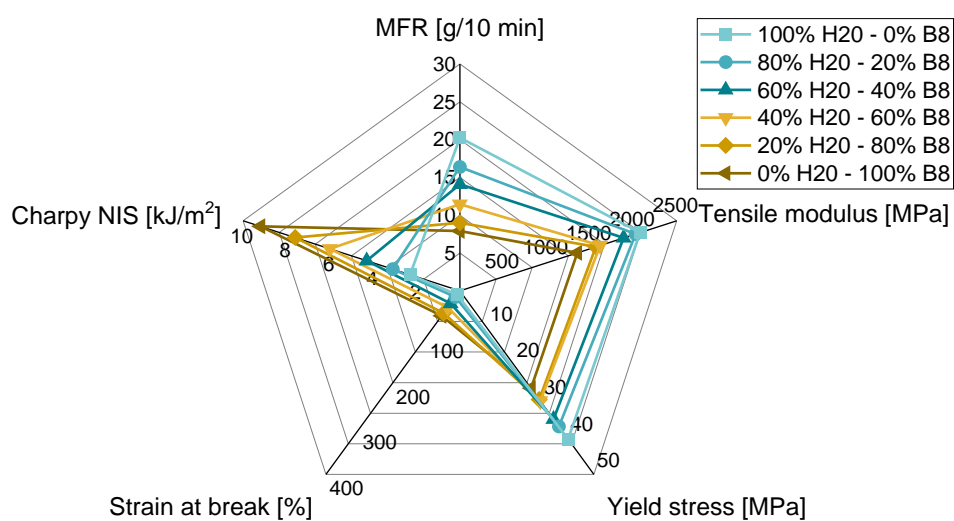

Figure S5. Property profiles of all blends of H20-B8.

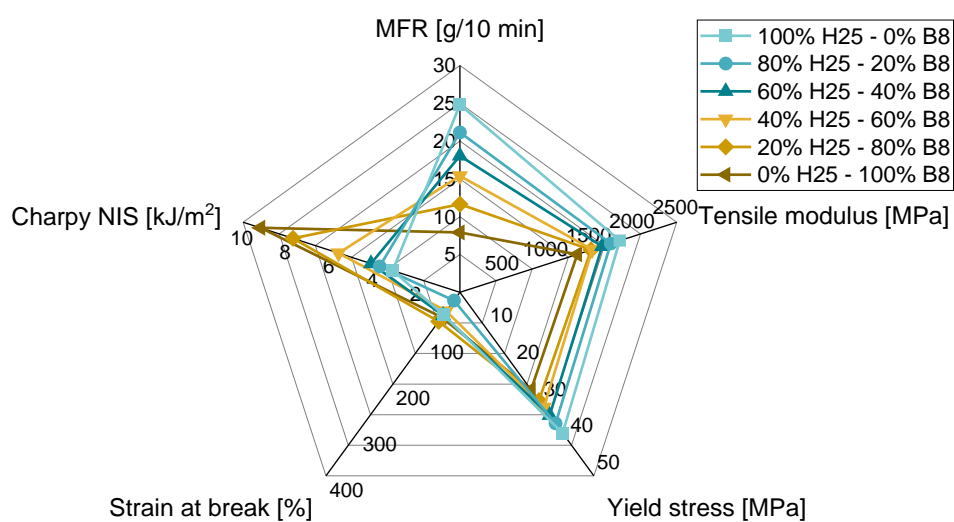

Figure S6. Property profiles of all blends of H25-B8.

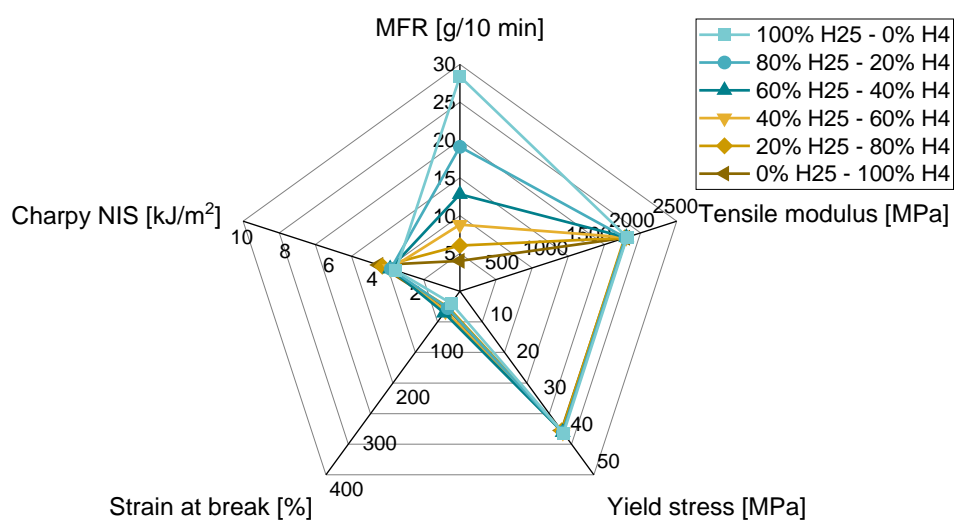

Figure S7. Property profiles of all blends of H25-H4.

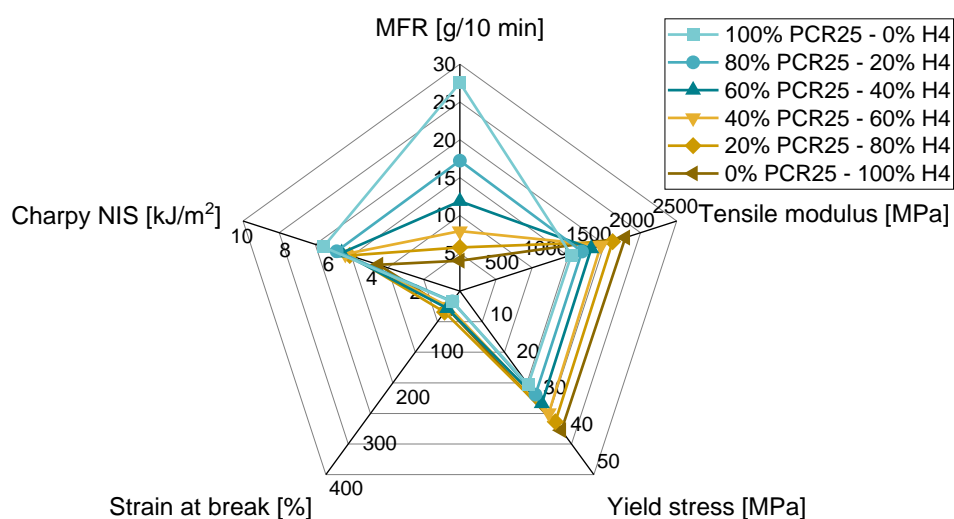

Figure S8. Property profiles of all blends of PCR25-H4.
